# Supplementary material for: Objective Assessment of Chronic Pain in Horses Using the Horse Chronic Pain Scale (HCPS): A Scale-Construction Study
Source: MDPI journal article supplement (doi:10.3390/ani11061826), 2021-06-18
Supplement: s1 [file s1]

## CPS week 1

| Horse | Day | Time | 1 | 2 | 3 | 4 | 5 | 6 |
|-------|-----|------|---|---|---|---|---|---|
| 1     | 1   | 1    | 0 | 0 | 0 | 0 | 0 | 0 |
| 2     | 1   | 1    | 0 | 0 | 0 | 0 | 0 | 0 |
| 3     | 1   | 1    | 0 | 0 | 0 | 0 | 0 | 2 |
| 4     | 1   | 1    | 0 | 0 | 0 | 0 | 0 | 2 |
| 5     | 1   | 1    | 0 | 0 | 0 | 0 | 0 | 0 |
| 6     | 1   | 1    | 0 | 0 | 0 | 0 | 0 | 0 |
| 7     | 1   | 1    | 0 | 0 | 0 | 0 | 0 | 0 |
| 8     | 1   | 1    | 0 | 0 | 0 | 0 | 0 | 0 |
| 9     | 1   | 1    | 0 | 0 | 0 | 0 | 0 | 0 |
| 10    | 1   | 1    | 1 | 0 | 0 | 0 | 0 | 0 |
| 11    | 1   | 1    | 0 | 0 | 0 | 0 | 0 | 0 |
| 12    | 1   | 1    | 0 | 0 | 0 | 0 | 0 |   |
|       |     |      |   |   |   |   |   |   |
| 1     | 2   | 2    | 0 | 0 | 0 | 0 | 0 | 0 |
| 2     | 2   | 2    | 0 | 0 | 0 | 0 | 0 | 0 |
| 3     | 2   | 2    | 0 | 0 | 0 | 0 | 0 | 2 |
| 4     | 2   | 2    | 0 | 0 | 0 | 0 | 0 | 2 |
| 5     | 2   | 2    | 0 | 0 | 0 | 0 | 0 | 0 |
| 6     | 2   | 2    | 0 | 0 | 0 | 0 | 0 | 2 |
| 7     | 2   | 2    | 0 | 0 | 0 | 0 | 0 | 0 |
| 8     | 2   | 2    | 0 | 0 | 0 | 0 | 0 | 0 |
| 9     | 2   | 2    | 0 | 0 | 0 | 0 | 0 | 0 |
| 10    | 2   | 2    | 1 | 0 | 0 | 0 | 0 | 0 |
| 11    | 2   | 2    | 0 | 0 | 0 | 0 | 0 | 0 |
| 12    | 2   | 2    | 0 | 0 | 0 | 0 | 0 | 0 |
|       |     |      |   |   |   |   |   |   |
| 1     | 3   | 3    | 0 | 0 | 0 | 0 | 0 | 0 |
| 2     | 3   | 3    | 0 | 0 | 0 | 0 | 0 | 0 |
| 3     | 3   | 3    | 0 | 0 | 0 | 0 | 0 | 2 |
| 4     | 3   | 3    | 0 | 0 | 0 | 0 | 0 | 2 |
| 5     | 3   | 3    | 0 | 0 | 0 | 0 | 0 | 2 |
| 6     | 3   | 3    | 0 | 0 | 0 | 0 | 0 | 0 |
| 7     | 3   | 3    | 0 | 0 | 0 | 0 | 0 | 0 |
| 8     | 3   | 3    | 0 | 0 | 0 | 0 | 0 | 0 |
| 9     | 3   | 3    | 0 | 0 | 0 | 0 | 0 | 0 |
| 10    | 3   | 3    | 1 | 0 | 0 | 0 | 0 | 0 |
| 11    | 3   | 3    | 0 | 0 | 0 | 0 | 0 | 0 |
| 12    | 3   | 3    | 0 | 0 | 0 | 0 | 0 | 0 |

## CPS week 2

| Horse | Day | Time | 1 | 2 | 3 | 4 | 5 | 6 |
|-------|-----|------|---|---|---|---|---|---|
| 1     | 1   | 1    | 0 | 0 | 0 | 0 | 0 | 0 |
| 2     | 1   | 1    | 0 | 0 | 0 | 0 | 0 | 0 |
| 3     | 1   | 1    | 0 | 0 | 0 | 0 | 0 | 0 |
| 4     | 1   | 1    | 0 | 0 | 0 | 0 | 0 | 0 |
| 5     | 1   | 1    | 0 | 0 | 0 | 0 | 0 | 0 |
| 6     | 1   | 1    | 0 | 0 | 0 | 0 | 0 | 0 |
| 7     | 1   | 1    | 0 | 0 | 0 | 0 | 0 | 0 |

|            |     |      |   |   |   |   |   |   |
|------------|-----|------|---|---|---|---|---|---|
|            | 8   | 1    | 0 | 0 | 0 | 0 | 0 | 0 |
|            | 9   | 1    | 0 | 0 | 0 | 0 | 0 | 0 |
|            | 10  | 1    | 0 | 0 | 0 | 0 | 0 | 0 |
|            | 11  | 1    | 0 | 0 | 0 | 0 | 0 | 0 |
|            | 12  | 1    | 0 | 0 | 0 | 0 | 0 | 0 |
|            | 13  | 1    | 0 | 0 | 0 | 0 | 0 | 0 |
|            | 14  | 1    | 0 | 0 | 0 | 0 | 0 | 0 |
|            | 15  | 1    | 0 | 0 | 0 | 0 | 0 | 0 |
|            | 16  | 1    | 0 | 0 | 0 | 0 | 0 | 0 |
| 7.2        | 1   | 2    | 0 | 0 | 0 | 0 | 0 | 0 |
|            | 2   | 2    | 0 | 0 | 0 | 0 | 0 | 0 |
|            | 3   | 2    | 0 | 0 | 0 | 0 | 0 | 0 |
|            | 4   | 2    | 0 | 0 | 0 | 0 | 0 | 0 |
|            | 5   | 2    | 0 | 0 | 0 | 0 | 0 | 0 |
|            | 6   | 2    | 0 | 0 | 0 | 0 | 0 | 0 |
|            |     | 2    | 0 | 0 | 0 | 0 | 0 | 0 |
|            | 8   | 2    | 0 | 0 | 0 | 0 | 0 | 3 |
|            | 9   | 2    | 1 | 0 | 0 | 0 | 1 | 0 |
|            | 10  | 2    | 0 | 0 | 0 | 0 | 0 | 0 |
|            | 11  | 2    | 0 | 0 | 0 | 0 | 0 | 0 |
|            | 12  | 2    | 0 | 0 | 0 | 0 | 0 | 3 |
|            | 13  | 2    | 0 | 0 | 0 | 0 | 0 | 0 |
|            | 14  | 2    | 0 | 0 | 0 | 0 | 0 | 0 |
|            | 15  | 2    | 0 | 0 | 0 | 0 | 0 | 0 |
|            | 16  | 2    | 0 | 0 | 0 | 0 | 0 | 0 |
| 7.2        | 1   | 3    | 0 | 0 | 0 | 0 | 0 | 0 |
|            | 2   | 3    | 0 | 0 | 0 | 0 | 0 | 0 |
|            | 3   | 3    | 0 | 0 | 0 | 0 | 0 | 0 |
|            | 4   | 3    | 0 | 0 | 0 | 0 | 0 | 0 |
|            | 5   | 3    | 0 | 0 | 0 | 0 | 0 | 0 |
|            | 6   | 3    | 0 | 0 | 0 | 0 | 0 | 0 |
|            |     | 3    | 0 | 0 | 0 | 0 | 0 | 0 |
|            | 8   | 3    | 0 | 0 | 0 | 0 | 0 | 0 |
|            | 9   | 3    | 0 | 0 | 0 | 0 | 0 | 0 |
|            | 10  | 3    | 0 | 0 | 0 | 0 | 0 | 0 |
|            | 11  | 3    | 0 | 0 | 0 | 0 | 0 | 0 |
|            | 12  | 3    | 0 | 0 | 0 | 0 | 0 | 0 |
|            | 13  | 3    | 1 | 0 | 0 | 0 | 0 | 0 |
|            | 14  | 3    | 0 | 0 | 0 | 0 | 0 | 0 |
|            | 15  | 3    | 0 | 0 | 0 | 0 | 0 | 0 |
|            | 16  | 3    | 0 | 0 | 0 | 0 | 0 | 0 |
| CPS week 3 |     |      |   |   |   |   |   |   |
| Horse      | Day | Time | 1 | 2 | 3 | 4 | 5 | 6 |
|            | 1   | 1    | 0 | 0 | 0 | 0 | 0 | 0 |
|            | 2   | 1    | 0 | 0 | 0 | 0 | 0 | 0 |
|            | 3   | 1    | 0 | 0 | 0 | 0 | 0 | 0 |

|    |   |   |   |   |   |   |   |
|----|---|---|---|---|---|---|---|
| 4  | 1 | 0 | 0 | 0 | 0 | 0 | 0 |
| 5  | 1 | 0 | 0 | 0 | 0 | 0 | 0 |
| 6  | 1 | 0 | 0 | 0 | 0 | 0 | 0 |
| 7  | 1 | 0 | 0 | 0 | 0 | 0 | 0 |
| 8  | 1 | 0 | 0 | 0 | 0 | 0 | 0 |
| 9  | 1 | 0 | 0 | 0 | 0 | 0 | 0 |
| 10 | 1 | 0 | 0 | 0 | 0 | 0 | 0 |
| 11 | 1 | 0 | 0 | 0 | 0 | 0 | 0 |
| 12 | 1 | 0 | 0 | 0 | 0 | 0 | 0 |
| 13 | 1 | 0 | 0 | 0 | 0 | 0 | 0 |
| 14 | 1 | 0 | 0 | 0 | 0 | 0 | 0 |

|    |   |   |   |   |   |   |   |
|----|---|---|---|---|---|---|---|
| 1  | 2 | 0 | 0 | 0 | 0 | 0 | 0 |
| 2  | 2 | 0 | 0 | 1 | 0 | 0 | 0 |
| 3  | 2 | 0 | 0 | 0 | 0 | 0 | 0 |
| 4  | 2 | 0 | 0 | 0 | 0 | 0 | 0 |
| 5  | 2 | 0 | 0 | 0 | 0 | 0 | 0 |
| 6  | 2 | 0 | 0 | 0 | 0 | 0 | 0 |
| 7  | 2 | 0 | 0 | 0 | 0 | 0 | 0 |
| 8  | 2 | 0 | 0 | 0 | 0 | 0 | 0 |
| 9  | 2 | 0 | 0 | 0 | 0 | 0 | 0 |
| 10 | 2 | 0 | 0 | 0 | 0 | 0 | 0 |
| 11 | 2 | 0 | 0 | 0 | 0 | 0 | 0 |
| 12 | 2 | 0 | 0 | 0 | 0 | 0 | 0 |
| 13 | 2 | 0 | 0 | 0 | 0 | 0 | 0 |
| 14 | 2 | 0 | 0 | 0 | 0 | 0 | 0 |

|    |   |   |   |   |   |   |   |
|----|---|---|---|---|---|---|---|
| 1  | 3 | 0 | 0 | 0 | 0 | 0 | 0 |
| 2  | 3 | 1 | 0 | 1 | 1 | 0 | 0 |
| 3  | 3 | 0 | 0 | 0 | 0 | 0 | 0 |
| 4  | 3 | 0 | 0 | 0 | 0 | 0 | 0 |
| 5  | 3 | 0 | 0 | 0 | 0 | 0 | 0 |
| 6  | 3 | 0 | 0 | 0 | 0 | 0 | 0 |
| 7  | 3 | 0 | 0 | 0 | 0 | 0 | 0 |
| 8  | 3 | 0 | 0 | 0 | 0 | 0 | 0 |
| 9  | 3 | 0 | 0 | 0 | 0 | 0 | 0 |
| 10 | 3 | 0 | 0 | 0 | 0 | 0 | 0 |
| 11 | 3 | 0 | 0 | 0 | 0 | 0 | 0 |
| 12 | 3 | 0 | 0 | 0 | 0 | 0 | 0 |
| 13 | 3 | 0 | 0 | 0 | 0 | 0 | 0 |
| 14 | 3 | 0 | 0 | 0 | 0 | 0 | 0 |

CPS week 4

| Horse | Day | Time | 1 | 2 | 3 | 4 | 5 | 6 |
|-------|-----|------|---|---|---|---|---|---|
| 1     | 1   |      | 0 | 0 | 0 | 0 | 0 | 0 |
| 2     | 1   |      | 0 | 0 | 0 | 0 | 0 | 0 |
| 3     | 1   |      | 0 | 0 | 1 | 1 | 0 | 0 |
| 4     | 1   |      | 0 | 0 | 0 | 0 | 0 | 0 |

|    |   |   |   |   |   |   |   |
|----|---|---|---|---|---|---|---|
| 5  | 1 | 0 | 0 | 0 | 0 | 0 | 0 |
| 6  | 1 | 0 | 0 | 1 | 0 | 0 | 0 |
| 7  | 1 | 0 | 0 | 0 | 0 | 0 | 0 |
| 8  | 1 | 0 | 0 | 0 | 0 | 0 | 0 |
| 9  | 1 | 0 | 0 | 0 | 0 | 0 | 0 |
| 10 | 1 | 0 | 0 | 0 | 0 | 0 | 0 |
| 11 | 1 | 0 | 0 | 0 | 0 | 0 | 0 |
| 12 | 1 | 0 | 0 | 1 | 2 | 0 | 0 |

|    |   |   |   |   |   |   |   |
|----|---|---|---|---|---|---|---|
| 1  | 2 | 0 | 0 | 0 | 0 | 0 | 0 |
| 2  | 2 | 0 | 0 | 0 | 0 | 0 | 0 |
| 3  | 2 | 0 | 0 | 0 | 0 | 0 | 0 |
| 4  | 2 | 0 | 0 | 0 | 0 | 0 | 0 |
| 5  | 2 | 0 | 0 | 0 | 0 | 0 | 0 |
| 6  | 2 | 0 | 0 | 0 | 0 | 0 | 0 |
| 7  | 2 | 0 | 0 | 0 | 0 | 0 | 0 |
| 8  | 2 | 0 | 0 | 0 | 0 | 0 | 0 |
| 9  | 2 | 0 | 0 | 0 | 0 | 0 | 0 |
| 10 | 2 | 0 | 0 | 0 | 0 | 0 | 0 |
| 11 | 2 | 0 | 0 | 0 | 0 | 0 | 0 |
| 12 | 2 | 0 | 0 | 1 | 2 | 0 | 0 |

|    |   |   |   |   |   |   |   |
|----|---|---|---|---|---|---|---|
| 1  | 3 | 0 | 0 | 0 | 0 | 0 | 0 |
| 2  | 3 | 0 | 0 | 0 | 0 | 0 | 0 |
| 3  | 3 | 0 | 0 | 1 | 1 | 0 | 0 |
| 4  | 3 | 0 | 0 | 0 | 0 | 0 | 0 |
| 5  | 3 | 0 | 0 | 0 | 0 | 0 | 0 |
| 6  | 3 | 0 | 0 | 0 | 0 | 0 | 0 |
| 7  | 3 | 0 | 0 | 0 | 0 | 0 | 0 |
| 8  | 3 | 0 | 0 | 0 | 0 | 0 | 0 |
| 9  | 3 | 0 | 0 | 0 | 0 | 0 | 0 |
| 10 | 3 | 0 | 0 | 0 | 0 | 0 | 0 |
| 11 | 3 | 0 | 0 | 0 | 0 | 0 | 0 |
| 12 | 3 | 1 | 0 | 0 | 0 | 1 | 1 |

CPS week 1 autumn

| Horse | Day | Time | 1 | 2 | 3 | 4 | 5 | 6 |
|-------|-----|------|---|---|---|---|---|---|
| 1     | 1   |      | 0 | 0 | 0 | 0 | 0 | 3 |
| 2     | 1   |      | 0 | 0 | 0 | 0 | 0 | 0 |
| 3     | 1   |      | 0 | 0 | 0 | 0 | 0 | 0 |
| 4     | 1   |      | 0 | 0 | 0 | 0 | 0 | 0 |
| 5     | 1   |      | 0 | 0 | 0 | 0 | 0 | 0 |
| 6     | 1   |      | 0 | 0 | 0 | 0 | 0 | 0 |
| 7     | 1   |      | 0 | 0 | 0 | 0 | 0 | 0 |
| 8     | 1   |      | 0 | 0 | 0 | 0 | 0 | 0 |
| 9     | 1   |      | 0 | 0 | 0 | 0 | 0 | 3 |
| 10    | 1   |      | 0 | 0 | 0 | 0 | 0 | 3 |
| 11    | 1   |      | 0 | 0 | 0 | 0 | 0 | 0 |
| 12    | 1   |      | 0 | 0 | 0 | 0 | 0 | 0 |

|    |   |   |   |   |   |   |   |
|----|---|---|---|---|---|---|---|
| 13 | 1 | 0 | 0 | 0 | 0 | 0 | 0 |
| 14 | 1 | 0 | 0 | 0 | 0 | 0 | 0 |
| 15 | 1 | 0 | 0 | 0 | 0 | 0 | 0 |
| 16 | 1 | 0 | 0 | 0 | 0 | 0 | 0 |

|    |   |   |   |   |   |   |   |
|----|---|---|---|---|---|---|---|
| 1  | 2 | 0 | 0 | 0 | 0 | 0 | 0 |
| 2  | 2 | 0 | 0 | 0 | 0 | 0 | 0 |
| 3  | 2 | 0 | 0 | 0 | 0 | 0 | 0 |
| 4  | 2 | 0 | 0 | 0 | 0 | 0 | 0 |
| 5  | 2 | 0 | 0 | 0 | 0 | 0 | 0 |
| 6  | 2 | 0 | 0 | 0 | 0 | 1 | 0 |
| 7  | 2 | 1 | 0 | 0 | 0 | 2 | 0 |
| 8  | 2 | 0 | 0 | 0 | 0 | 0 | 0 |
| 9  | 2 | 0 | 0 | 0 | 0 | 0 | 0 |
| 10 | 2 | 0 | 0 | 0 | 0 | 0 | 0 |
| 11 | 2 | 0 | 0 | 0 | 0 | 0 | 0 |
| 12 | 2 | 0 | 0 | 0 | 0 | 0 | 0 |
| 13 | 2 | 0 | 0 | 0 | 0 | 0 | 0 |
| 14 | 2 | 0 | 0 | 0 | 0 | 1 | 0 |
| 15 | 2 | 0 | 0 | 0 | 0 | 0 | 0 |
| 16 | 2 | 0 | 0 | 0 | 0 | 0 | 0 |

|    |   |   |   |   |   |   |   |
|----|---|---|---|---|---|---|---|
| 1  | 3 | 0 | 0 | 0 | 0 | 0 | 0 |
| 2  | 3 | 0 | 0 | 0 | 0 | 0 | 0 |
| 3  | 3 | 0 | 0 | 0 | 0 | 1 | 0 |
| 4  | 3 | 0 | 0 | 0 | 0 | 0 | 0 |
| 5  | 3 | 1 | 0 | 0 | 0 | 0 | 3 |
| 6  | 3 | 0 | 0 | 0 | 0 | 1 | 0 |
| 7  | 3 | 0 | 0 | 0 | 0 | 0 | 0 |
| 8  | 3 | 0 | 0 | 0 | 0 | 0 | 0 |
| 9  | 3 | 0 | 0 | 0 | 0 | 1 | 3 |
| 10 | 3 | 0 | 0 | 0 | 0 | 0 | 0 |
| 11 | 3 | 0 | 0 | 0 | 0 | 2 | 3 |
| 12 | 3 | 0 | 0 | 0 | 0 | 1 | 0 |
| 13 | 3 | 0 | 0 | 0 | 0 | 0 | 0 |
| 14 | 3 | 0 | 0 | 0 | 0 | 1 | 0 |
| 15 | 3 | 0 | 0 | 0 | 0 | 0 | 0 |
| 16 | 3 | 0 | 0 | 0 | 0 | 1 | 0 |

CPS week 2 autumn

| Horse | Day | Time | 1 | 2 | 3 | 4 | 5 | 6 |
|-------|-----|------|---|---|---|---|---|---|
| 1     | 1   |      | 0 | 0 | 0 | 0 | 0 | 3 |
| 2     | 1   |      | 0 | 0 | 0 | 0 | 1 | 3 |
| 3     | 1   |      | 1 | 0 | 1 | 0 | 1 | 3 |
| 4     | 1   |      | 0 | 0 | 0 | 0 | 0 | 0 |
| 5     | 1   |      | 1 | 0 | 0 | 0 | 1 | 0 |
| 6     | 1   |      | 0 | 0 | 0 | 0 | 0 | 3 |
| 7     | 1   |      | 0 | 0 | 0 | 0 | 0 | 0 |
| 8     | 1   |      | 0 | 0 | 0 | 0 | 0 | 0 |

|    |   |   |   |   |   |   |   |
|----|---|---|---|---|---|---|---|
| 9  | 1 | 0 | 0 | 0 | 0 | 1 | 0 |
| 10 | 1 | 1 | 0 | 1 | 0 | 1 | 0 |
| 11 | 1 | 0 | 0 | 0 | 0 | 0 | 0 |
| 12 | 1 | 0 | 0 | 0 | 0 | 1 | 3 |
| 13 | 1 | 0 | 0 | 0 | 0 | 0 | 0 |
| 14 | 1 | 1 | 0 | 0 | 0 | 1 | 3 |
| 15 | 1 | 0 | 0 | 0 | 0 | 0 | 0 |
| 16 | 1 | 0 | 0 | 0 | 0 | 0 | 0 |

|    |   |   |   |   |   |   |   |
|----|---|---|---|---|---|---|---|
| 1  | 2 | 1 | 0 | 0 | 0 | 1 | 3 |
| 2  | 2 | 1 | 0 | 0 | 0 | 1 | 3 |
| 3  | 2 | 0 | 0 | 0 | 0 | 0 | 0 |
| 4  | 2 | 0 | 0 | 0 | 0 | 0 | 0 |
| 5  | 2 | 0 | 0 | 1 | 0 | 1 | 0 |
| 6  | 2 | 0 | 0 | 0 | 0 | 0 | 3 |
| 7  | 2 | 0 | 0 | 0 | 0 | 0 | 0 |
| 8  | 2 | 1 | 0 | 0 | 0 | 1 | 3 |
| 9  | 2 | 0 | 0 | 0 | 0 | 0 | 0 |
| 10 | 2 | 1 | 0 | 1 | 0 | 1 | 0 |
| 11 | 2 | 0 | 0 | 0 | 0 | 0 | 0 |
| 12 | 2 | 0 | 0 | 0 | 0 | 1 | 3 |
| 13 | 2 | 0 | 0 | 1 | 1 | 1 | 3 |
| 14 | 2 | 1 | 0 | 0 | 0 | 2 | 3 |
| 15 | 2 | 0 | 0 | 0 | 0 | 0 | 0 |
| 16 | 2 | 0 | 0 | 0 | 0 | 0 | 0 |

|    |   |   |   |   |   |   |   |
|----|---|---|---|---|---|---|---|
| 1  | 3 | 0 | 0 | 0 | 0 | 0 | 3 |
| 2  | 3 | 1 | 0 | 0 | 0 | 1 | 0 |
| 3  | 3 | 1 | 0 | 1 | 0 | 2 | 3 |
| 4  | 3 | 0 | 0 | 0 | 0 | 0 | 3 |
| 5  | 3 | 0 | 0 | 0 | 0 | 1 | 0 |
| 6  | 3 | 0 | 0 | 0 | 0 | 0 | 0 |
| 7  | 3 | 0 | 0 | 0 | 0 | 0 | 0 |
| 8  | 3 | 1 | 0 | 0 | 0 | 1 | 3 |
| 9  | 3 | 0 | 0 | 0 | 0 | 0 | 0 |
| 10 | 3 | 1 | 0 | 1 | 0 | 1 | 0 |
| 11 | 3 | 0 | 0 | 1 | 0 | 0 | 0 |
| 12 | 3 | 0 | 0 | 0 | 0 | 0 | 3 |
| 13 | 3 | 0 | 0 | 1 | 1 | 0 | 0 |
| 14 | 3 | 0 | 0 | 0 | 0 | 0 | 3 |
| 15 | 3 | 0 | 0 | 0 | 0 | 0 | 0 |
| 16 | 3 | 0 | 0 | 0 | 0 | 0 | 0 |

| 7 | 8 | 9 | 10 | 11 | 12 | 13 | 14 | 15 |
|---|---|---|----|----|----|----|----|----|
| 0 | 0 | 3 | 0  | 0  | 0  | 0  | 0  | 0  |
| 0 | 0 | 0 | 0  | 0  | 0  | 0  | 0  | 0  |
| 0 | 3 | 0 | 1  | 0  | 0  | 0  | 0  | 0  |
| 0 | 0 | 0 | 0  | 0  | 0  | 0  | 0  | 2  |
| 0 | 0 | 0 | 0  | 0  | 0  | 1  | 1  | 1  |
| 0 | 0 | 1 | 0  | 0  | 0  | 0  | 0  | 0  |
| 0 | 0 | 1 |    | 0  | 0  | 0  | 1  | 0  |
| 0 | 2 | 0 | 0  | 0  | 0  | 0  | 0  | 0  |
| 0 | 1 | 1 | 0  | 0  | 0  | 0  | 0  | 0  |
| 0 | 0 | 0 | 0  | 0  | 1  | 0  | 0  | 0  |
| 0 | 3 | 1 | 0  | 0  | 0  | 0  | 0  | 0  |
| 0 | 0 | 1 | 1  | 0  | 0  | 0  | 1  | 0  |

|   |   |   |   |   |   |   |   |   |
|---|---|---|---|---|---|---|---|---|
| 0 | 0 | 3 | 0 | 0 | 0 | 0 | 0 | 0 |
| 0 | 2 | 0 | 1 | 0 | 0 | 0 | 0 | 0 |
| 0 | 3 | 0 | 1 | 0 | 0 | 0 | 0 | 2 |
| 0 | 2 | 0 | 0 | 0 | 1 | 0 | 0 | 2 |
| 0 | 3 | 1 | 1 | 0 | 0 | 0 | 3 | 2 |
| 0 | 0 | 1 | 0 | 0 | 0 | 0 | 0 | 0 |
| 0 | 3 | 1 | 0 | 0 | 0 | 0 | 2 | 0 |
| 0 | 3 | 0 | 0 | 0 | 0 | 0 | 0 | 0 |
| 0 | 0 | 1 | 0 | 0 | 0 | 1 | 0 | 0 |
| 0 | 2 | 0 | 0 | 0 | 1 | 0 | 0 | 0 |
| 0 | 0 | 1 | 0 | 0 | 0 | 0 | 0 | 0 |
| 0 | 0 | 1 | 1 | 0 | 0 | 0 | 1 | 0 |

|   |   |   |   |   |   |   |   |   |
|---|---|---|---|---|---|---|---|---|
| 0 | 1 | 3 | 0 | 0 | 0 | 0 | 0 | 0 |
| 0 | 3 | 0 | 1 | 0 | 0 | 0 | 0 | 0 |
| 0 | 3 | 0 | 1 | 0 | 0 | 0 | 0 | 2 |
| 0 | 0 | 0 | 0 | 0 | 1 | 0 | 0 | 2 |
| 0 | 3 | 1 | 1 | 0 | 0 | 0 | 3 | 2 |
| 0 | 3 | 1 | 0 | 0 | 0 | 0 | 0 | 0 |
| 0 | 3 | 1 | 0 | 0 | 0 | 0 | 1 | 0 |
| 0 | 0 | 3 | 0 | 0 | 0 | 0 | 0 | 0 |
| 0 | 0 | 1 | 0 | 0 | 0 | 0 | 0 | 0 |
| 0 | 0 | 0 | 0 | 0 | 1 | 0 | 0 | 0 |
| 0 | 0 | 1 | 0 | 0 | 0 | 0 | 0 | 0 |
| 0 | 1 | 1 | 1 | 0 | 0 | 0 | 1 | 0 |

| 7 | 8 | 9 | 10 | 11 | 12 | 13 | 14 | 15 |
|---|---|---|----|----|----|----|----|----|
| 0 | 0 | 0 | 1  | 0  | 0  | 0  | 0  | 0  |
| 0 | 1 | 0 | 1  | 0  | 0  | 0  | 1  | 0  |
| 0 | 1 | 0 | 0  | 0  | 0  | 0  | 1  | 0  |
| 0 | 0 | 1 | 2  | 0  | 0  | 0  | 1  | 0  |
| 0 | 1 | 1 | 1  | 0  | 0  | 0  | 3  | 0  |
| 0 | 3 | 0 | 1  | 0  | 0  | 0  | 0  | 2  |
| 0 | 0 | 0 | 2  | 0  | 0  | 0  | 0  | 0  |

|   |   |   |   |   |   |   |   |   |
|---|---|---|---|---|---|---|---|---|
| 0 | 0 | 0 | 1 | 0 | 0 | 0 | 0 | 0 |
| 0 | 3 | 1 | 0 | 0 | 0 | 0 | 2 | 0 |
| 0 | 0 | 0 | 1 | 0 | 0 | 0 | 0 | 0 |
| 0 | 0 | 0 | 1 | 0 | 0 | 0 | 1 | 1 |
| 0 | 0 | 0 | 1 | 0 | 0 | 0 | 1 | 0 |
| 0 | 1 | 0 | 1 | 0 | 1 | 0 | 0 | 0 |
| 0 | 0 | 1 | 2 | 0 | 0 | 0 | 0 | 0 |
| 0 | 0 | 1 | 2 | 0 | 0 | 0 | 0 | 0 |
| 0 | 1 | 0 | 1 | 0 | 0 | 0 | 0 | 1 |

|   |   |   |   |   |   |   |   |   |
|---|---|---|---|---|---|---|---|---|
| 0 | 0 | 0 | 1 | 0 | 0 | 0 | 0 | 0 |
| 0 | 3 | 0 | 1 | 0 | 0 | 0 | 0 | 1 |
| 0 | 1 | 1 | 0 | 0 | 0 | 0 | 0 | 0 |
| 0 | 0 | 1 | 2 | 0 | 0 | 0 | 1 | 0 |
| 0 | 2 | 1 | 1 | 0 | 0 | 0 | 3 | 1 |
| 0 | 2 | 0 | 0 | 0 | 0 | 0 | 0 | 1 |
| 0 | 1 | 0 | 1 | 0 | 0 | 0 | 0 | 0 |
| 0 | 0 | 0 | 1 | 0 | 0 | 0 | 0 | 0 |
| 0 | 2 | 3 | 0 | 0 | 0 | 0 | 2 | 0 |
| 0 | 1 | 0 | 0 | 0 | 0 | 0 | 0 | 1 |
| 0 | 0 | 0 | 1 | 0 | 0 | 0 | 1 | 1 |
| 0 | 1 | 0 | 0 | 0 | 0 | 0 | 0 | 0 |
| 0 | 1 | 1 | 1 | 0 | 1 | 0 | 0 | 0 |
| 0 | 0 | 0 | 1 | 2 | 0 | 0 | 0 | 0 |
| 0 | 2 | 1 | 2 | 0 | 0 | 0 | 0 | 0 |
| 0 | 2 | 0 | 1 | 0 | 0 | 1 | 0 | 1 |

|   |   |   |   |   |   |   |   |   |
|---|---|---|---|---|---|---|---|---|
| 0 | 0 | 0 | 1 | 0 | 0 | 0 | 0 | 1 |
| 0 | 1 | 0 | 1 | 0 | 0 | 0 | 0 | 1 |
| 0 | 1 | 1 | 0 | 0 | 0 | 0 | 2 | 0 |
| 0 | 1 | 1 | 2 | 0 | 0 | 0 | 1 | 0 |
| 0 | 2 | 1 | 1 | 0 | 0 | 0 | 3 | 1 |
| 0 | 3 | 0 | 0 | 0 | 0 | 0 | 0 | 1 |
| 0 | 1 | 0 | 1 | 0 | 0 | 0 | 0 | 0 |
| 0 | 0 | 0 | 1 | 0 | 0 | 0 | 0 | 0 |
| 0 | 1 | 3 | 0 | 0 | 0 | 0 | 2 | 0 |
| 0 | 1 | 0 | 0 | 0 | 0 | 0 | 0 | 1 |
| 0 | 0 | 0 | 1 | 0 | 0 | 0 | 0 | 1 |
| 0 | 1 | 0 | 0 | 0 | 0 | 0 | 0 | 0 |
| 0 | 1 | 1 | 1 | 0 | 1 | 0 | 0 | 0 |
| 0 | 0 | 0 | 1 | 2 | 0 | 0 | 0 | 0 |
| 0 | 2 | 1 | 2 | 0 | 0 | 0 | 0 | 0 |
| 0 | 3 | 0 | 1 | 0 | 0 | 1 | 0 | 1 |

|          |          |          |           |           |           |           |           |           |
|----------|----------|----------|-----------|-----------|-----------|-----------|-----------|-----------|
| <b>7</b> | <b>8</b> | <b>9</b> | <b>10</b> | <b>11</b> | <b>12</b> | <b>13</b> | <b>14</b> | <b>15</b> |
| 0        | 3        | 1        | 1         | 0         | 0         | 0         | 0         | 0         |
| 0        | 2        | 1        | 1         | 0         | 0         | 0         | 0         | 0         |
| 0        | 0        | 1        | 0         | 0         | 0         | 0         | 0         | 0         |



|   |   |   |   |   |   |   |   |   |
|---|---|---|---|---|---|---|---|---|
| 0 | 2 | 0 | 1 | 0 | 0 | 0 | 0 | 0 |
| 0 | 0 | 1 | 1 | 0 | 0 | 0 | 0 | 0 |
| 0 | 1 | 0 | 1 | 0 | 0 | 0 | 0 | 0 |
| 0 | 3 | 1 | 2 | 0 | 0 | 0 | 0 | 0 |
| 0 | 0 | 0 | 1 | 0 | 0 | 0 | 0 | 0 |
| 0 | 0 | 1 | 1 | 0 | 0 | 0 | 0 | 0 |
| 0 | 3 | 0 | 2 | 0 | 0 | 0 | 2 | 0 |
| 0 | 1 | 0 | 0 | 0 | 0 | 0 | 0 | 0 |
| 0 | 0 | 0 | 0 | 0 | 0 | 0 | 0 | 0 |
| 0 | 3 | 0 | 1 | 0 | 0 | 0 | 0 | 0 |
| 0 | 2 | 1 | 0 | 0 | 0 | 0 | 0 | 0 |

|   |   |   |   |   |   |   |   |   |
|---|---|---|---|---|---|---|---|---|
| 0 | 1 | 1 | 1 | 0 | 0 | 0 | 0 | 0 |
| 0 | 2 | 1 | 1 | 0 | 0 | 0 | 1 | 0 |
| 0 | 1 | 1 | 0 | 0 | 0 | 0 | 0 | 0 |
| 0 | 1 | 0 | 1 | 0 | 0 | 0 | 1 | 0 |
| 0 | 0 | 1 | 1 | 0 | 0 | 0 | 0 | 0 |
| 0 | 1 | 0 | 1 | 0 | 0 | 0 | 0 | 0 |
| 0 | 3 | 1 | 2 | 0 | 0 | 0 | 0 | 0 |
| 0 | 0 | 0 | 1 | 0 | 0 | 0 | 0 | 0 |
| 0 | 0 | 1 | 1 | 0 | 0 | 0 | 0 | 0 |
| 0 | 3 | 0 | 2 | 0 | 0 | 0 | 2 | 0 |
| 0 | 0 | 0 | 0 | 0 | 0 | 0 | 0 | 0 |
| 0 | 1 | 0 | 0 | 0 | 0 | 0 | 1 | 0 |
| 0 | 1 | 0 | 1 | 0 | 0 | 0 | 0 | 0 |
| 0 | 0 | 1 | 0 | 0 | 0 | 0 | 0 | 0 |

|   |   |   |   |   |   |   |   |   |
|---|---|---|---|---|---|---|---|---|
| 0 | 3 | 0 | 1 | 0 | 0 | 0 | 0 | 0 |
| 0 | 3 | 1 | 1 | 0 | 0 | 0 | 1 | 0 |
| 0 | 1 | 1 | 0 | 0 | 0 | 0 | 0 | 0 |
| 0 | 1 | 0 | 1 | 0 | 0 | 0 | 0 | 0 |
| 0 | 0 | 1 | 1 | 0 | 0 | 0 | 0 | 0 |
| 0 | 3 | 0 | 1 | 0 | 0 | 0 | 0 | 0 |
| 0 | 3 | 1 | 2 | 0 | 0 | 0 | 0 | 0 |
| 0 | 1 | 0 | 1 | 0 | 0 | 0 | 0 | 0 |
| 0 | 0 | 1 | 1 | 0 | 0 | 0 | 0 | 1 |
| 0 | 3 | 0 | 2 | 0 | 0 | 0 | 2 | 0 |
| 0 | 0 | 0 | 0 | 0 | 0 | 0 | 0 | 0 |
| 0 | 3 | 0 | 0 | 0 | 0 | 0 | 1 | 0 |
| 0 | 3 | 0 | 1 | 0 | 0 | 0 | 0 | 0 |
| 0 | 1 | 1 | 0 | 0 | 0 | 0 | 1 | 0 |

|          |          |          |           |           |           |           |           |           |
|----------|----------|----------|-----------|-----------|-----------|-----------|-----------|-----------|
| <b>7</b> | <b>8</b> | <b>9</b> | <b>10</b> | <b>11</b> | <b>12</b> | <b>13</b> | <b>14</b> | <b>15</b> |
| 0        | 3        | 1        | 1         | 0         | 0         | 0         | 1         | 0         |
| 0        | 3        | 1        | 0         | 0         | 0         | 0         | 0         | 1         |
| 0        | 3        | 1        | 1         | 0         | 0         | 0         | 1         | 0         |
| 0        | 0        | 1        | 2         | 0         | 0         | 0         | 0         | 0         |



|          |          |          |           |           |           |           |           |           |
|----------|----------|----------|-----------|-----------|-----------|-----------|-----------|-----------|
| 0        | 0        | 3        | 2         | 0         | 0         | 0         | 0         | 0         |
| 0        | 1        | 1        | 1         | 0         | 0         | 0         | 0         | 0         |
| 0        | 1        | 3        | 1         | 0         | 0         | 1         | 0         | 0         |
| 0        | 0        | 1        | 2         | 0         | 0         | 0         | 0         | 0         |
| 0        | 1        | 1        | 0         | 0         | 0         | 0         | 0         | 0         |
| 0        | 3        | 1        | 3         | 0         | 0         | 0         | 1         | 2         |
| 0        | 3        | 1        | 2         | 0         | 0         | 0         | 3         | 0         |
| 0        | 3        | 0        | 1         | 0         | 0         | 0         | 0         | 0         |
| 0        | 0        | 1        | 0         | 0         | 0         | 0         | 3         | 0         |
| 0        | 3        | 0        | 2         | 0         | 0         | 0         | 0         | 3         |
| 0        | 1        | 0        | 1         | 0         | 0         | 0         | 1         | 0         |
| 0        | 3        | 0        | 1         | 0         | 0         | 0         | 0         | 0         |
| 0        | 0        | 2        | 0         | 0         | 0         | 0         | 0         | 0         |
| 0        | 3        | 0        | 1         | 0         | 0         | 1         | 1         | 0         |
| 0        | 0        | 1        | 1         | 0         | 0         | 0         | 0         | 0         |
| 0        | 0        | 0        | 0         | 0         | 0         | 0         | 0         | 0         |
| 0        | 3        | 3        | 2         | 0         | 0         | 1         | 1         | 0         |
| 0        | 1        | 1        | 1         | 0         | 0         | 0         | 0         | 0         |
| 0        | 3        | 3        | 1         | 0         | 0         | 1         | 0         | 0         |
| 0        | 1        | 1        | 2         | 0         | 0         | 0         | 0         | 0         |
| 3        | 1        | 1        | 0         | 0         | 0         | 1         | 0         | 0         |
| 0        | 2        | 1        | 2         | 0         | 0         | 0         | 1         | 2         |
| 0        | 3        | 1        | 2         | 0         | 0         | 0         | 3         | 0         |
| 0        | 3        | 0        | 1         | 0         | 0         | 0         | 0         | 0         |
| 3        | 0        | 1        | 0         | 0         | 0         | 0         | 3         | 1         |
| 0        | 3        | 0        | 2         | 0         | 0         | 0         | 0         | 3         |
| 0        | 2        | 0        | 1         | 0         | 0         | 0         | 0         | 0         |
| 1        | 3        | 0        | 1         | 0         | 0         | 0         | 0         | 0         |
| 3        | 3        | 2        | 0         | 0         | 0         | 0         | 0         | 0         |
| 0        | 3        | 0        | 1         | 0         | 0         | 1         | 1         | 0         |
| 0        | 0        | 1        | 1         | 0         | 0         | 0         | 0         | 0         |
| 1        | 0        | 0        | 0         | 0         | 0         | 0         | 0         | 0         |
| 0        | 3        | 3        | 2         | 0         | 0         | 2         | 2         | 0         |
| 1        | 1        | 1        | 1         | 0         | 0         | 1         | 1         | 0         |
| 0        | 3        | 3        | 1         | 0         | 0         | 1         | 0         | 1         |
| 0        | 1        | 1        | 2         | 0         | 0         | 0         | 1         | 0         |
| <b>7</b> | <b>8</b> | <b>9</b> | <b>10</b> | <b>11</b> | <b>12</b> | <b>13</b> | <b>14</b> | <b>15</b> |
| 0        | 1        | 3        | 0         | 0         | 0         | 0         | 1         | 0         |
| 0        | 0        | 1        | 0         | 0         | 0         | 0         | 0         | 0         |
| 3        | 3        | 1        | 1         | 0         | 1         | 0         | 3         | 0         |
| 0        | 1        | 3        | 0         | 0         | 0         | 0         | 0         | 0         |
| 0        | 3        | 1        | 1         | 0         | 0         | 0         | 0         | 0         |
| 0        | 2        | 1        | 1         | 0         | 0         | 0         | 0         | 0         |
| 0        | 1        | 0        | 2         | 0         | 0         | 0         | 0         | 0         |
| 0        | 3        | 1        | 0         | 0         | 0         | 0         | 0         | 0         |

|   |   |   |   |   |   |   |   |   |
|---|---|---|---|---|---|---|---|---|
| 0 | 3 | 0 | 1 | 0 | 0 | 0 | 1 | 0 |
| 0 | 3 | 0 | 0 | 0 | 0 | 0 | 0 | 0 |
| 3 | 0 | 0 | 0 | 0 | 0 | 1 | 0 | 0 |
| 0 | 1 | 0 | 0 | 0 | 0 | 0 | 1 | 0 |
| 0 | 1 | 1 | 0 | 0 | 0 | 0 | 0 | 0 |
| 0 | 1 | 3 | 0 | 0 | 0 | 0 | 1 | 1 |
| 0 | 2 | 1 | 1 | 0 | 0 | 0 | 0 | 0 |
| 0 | 3 | 3 | 1 | 0 | 0 | 0 | 0 | 0 |
| 0 | 1 | 3 | 0 | 0 | 0 | 0 | 2 | 0 |
| 0 | 1 | 1 | 0 | 0 | 0 | 0 | 0 | 0 |
| 0 | 3 | 1 | 1 | 0 | 1 | 3 | 3 | 0 |
| 0 | 1 | 3 | 0 | 0 | 0 | 0 | 0 | 0 |
| 0 | 3 | 1 | 1 | 0 | 0 | 0 | 1 | 0 |
| 0 | 2 | 1 | 1 | 0 | 0 | 0 | 0 | 0 |
| 0 | 2 | 0 | 2 | 0 | 0 | 0 | 0 | 0 |
| 0 | 3 | 1 | 0 | 0 | 0 | 0 | 0 | 0 |
| 0 | 3 | 0 | 1 | 0 | 0 | 0 | 1 | 0 |
| 0 | 3 | 0 | 0 | 0 | 0 | 0 | 1 | 0 |
| 0 | 0 | 0 | 0 | 0 | 0 | 1 | 0 | 0 |
| 0 | 1 | 0 | 0 | 0 | 0 | 0 | 1 | 0 |
| 0 | 0 | 1 | 0 | 0 | 0 | 0 | 0 | 0 |
| 0 | 3 | 3 | 0 | 0 | 0 | 0 | 1 | 1 |
| 0 | 2 | 1 | 1 | 0 | 0 | 0 | 1 | 0 |
| 0 | 3 | 3 | 1 | 0 | 0 | 0 | 1 | 0 |
| 0 | 1 | 3 | 0 | 0 | 0 | 0 | 2 | 0 |
| 0 | 1 | 1 | 0 | 0 | 0 | 0 | 0 | 0 |
| 0 | 3 | 1 | 1 | 0 | 1 | 3 | 3 | 0 |
| 0 | 1 | 3 | 0 | 0 | 0 | 0 | 0 | 0 |
| 0 | 3 | 1 | 1 | 0 | 0 | 0 | 1 | 0 |
| 0 | 2 | 1 | 1 | 0 | 0 | 0 | 1 | 0 |
| 0 | 0 | 1 | 0 | 2 | 0 | 0 | 0 | 0 |
| 0 | 2 | 1 | 0 | 0 | 0 | 0 | 0 | 0 |
| 0 | 3 | 0 | 1 | 0 | 0 | 0 | 1 | 0 |
| 0 | 3 | 0 | 0 | 0 | 0 | 0 | 0 | 0 |
| 0 | 0 | 0 | 0 | 0 | 0 | 1 | 0 | 0 |
| 0 | 1 | 0 | 0 | 0 | 0 | 0 | 1 | 0 |
| 0 | 0 | 1 | 0 | 0 | 0 | 0 | 1 | 0 |
| 0 | 2 | 3 | 0 | 0 | 0 | 0 | 1 | 1 |
| 0 | 2 | 1 | 1 | 0 | 0 | 0 | 1 | 0 |
| 0 | 3 | 3 | 1 | 0 | 0 | 0 | 1 | 0 |

|           |               |
|-----------|---------------|
| <b>16</b> | <b>Totaal</b> |
| 0         | 3             |
| 1         | 1             |
| 0         | 6             |
| 0         | 4             |
| 0         | 3             |
| 0         | 1             |
| 1         | 3             |
| 1         | 3             |
| 0         | 2             |
| 0         | 2             |
| 0         | 4             |
| 0         | 3             |
| 0         | 3             |
| 1         | 4             |
| 0         | 8             |
| 0         | 7             |
| 2         | 12            |
| 1         | 4             |
| 1         | 7             |
| 1         | 4             |
| 0         | 2             |
| 0         | 4             |
| 0         | 1             |
| 0         | 3             |
| 0         | 4             |
| 1         | 5             |
| 0         | 8             |
| 0         | 5             |
| 1         | 13            |
| 0         | 4             |
| 1         | 6             |
| 1         | 4             |
| 0         | 1             |
| 0         | 2             |
| 0         | 1             |
| 0         | 4             |

|           |               |
|-----------|---------------|
| <b>16</b> | <b>Totaal</b> |
| 0         | 1             |
| 0         | 3             |
| 1         | 3             |
| 0         | 4             |
| 2         | 8             |
| 1         | 7             |
| 2         | 4             |

|    |        |
|----|--------|
| 0  | 1      |
| 1  | 7      |
| 0  | 1      |
| 0  | 3      |
| 0  | 2      |
| 0  | 3      |
| 1  | 4      |
| 2  | 5      |
| 0  | 3      |
| 0  | 1      |
| 0  | 5      |
| 1  | 3      |
| 0  | 4      |
| 2  | 10     |
| 1  | 4      |
| 0  | 2      |
| 1  | 5      |
| 1  | 10     |
| 0  | 2      |
| 2  | 5      |
| 1  | 5      |
| 1  | 5      |
| 1  | 4      |
| 2  | 7      |
| 0  | 5      |
| 0  | 2      |
| 0  | 3      |
| 1  | 5      |
| 0  | 5      |
| 2  | 10     |
| 0  | 4      |
| 1  | 3      |
| 1  | 2      |
| 1  | 7      |
| 0  | 2      |
| 1  | 3      |
| 1  | 2      |
| 0  | 5      |
| 1  | 4      |
| 2  | 7      |
| 0  | 6      |
| 16 | Totaal |
| 0  | 5      |
| 0  | 4      |
| 0  | 1      |

|    |        |
|----|--------|
| 0  | 3      |
| 0  | 2      |
| 0  | 2      |
| 0  | 6      |
| 0  | 1      |
| 0  | 2      |
| 0  | 7      |
| 0  | 1      |
| 0  | 0      |
| 0  | 4      |
| 0  | 3      |
|    |        |
| 0  | 3      |
| 0  | 6      |
| 0  | 2      |
| 0  | 3      |
| 0  | 2      |
| 0  | 2      |
| 0  | 6      |
| 0  | 1      |
| 0  | 2      |
| 0  | 7      |
| 0  | 0      |
| 1  | 3      |
| 0  | 2      |
| 0  | 1      |
|    |        |
| 0  | 4      |
| 2  | 11     |
| 0  | 2      |
| 0  | 2      |
| 0  | 2      |
| 0  | 4      |
| 0  | 6      |
| 0  | 2      |
| 1  | 4      |
| 1  | 8      |
| 0  | 0      |
| 1  | 5      |
| 0  | 4      |
| 1  | 4      |
|    |        |
| 16 | Totaal |
| 0  | 6      |
| 0  | 5      |
| 1  | 9      |
| 0  | 3      |

|    |        |
|----|--------|
| 1  | 3      |
| 1  | 7      |
| 0  | 2      |
| 1  | 6      |
| 1  | 7      |
| 1  | 9      |
| 0  | 2      |
| 2  | 14     |
| 0  | 6      |
| 1  | 6      |
| 1  | 6      |
| 1  | 4      |
| 1  | 3      |
| 1  | 6      |
| 0  | 2      |
| 0  | 2      |
| 1  | 7      |
| 1  | 9      |
| 0  | 3      |
| 2  | 13     |
| 0  | 7      |
| 1  | 5      |
| 1  | 9      |
| 0  | 4      |
| 1  | 3      |
| 1  | 6      |
| 0  | 2      |
| 1  | 6      |
| 1  | 6      |
| 1  | 9      |
| 0  | 4      |
| 2  | 15     |
| 16 | Totaal |
| 0  | 7      |
| 0  | 9      |
| 1  | 10     |
| 1  | 5      |
| 1  | 4      |
| 0  | 8      |
| 0  | 1      |
| 1  | 3      |
| 1  | 6      |
| 0  | 7      |
| 0  | 2      |
| 0  | 0      |



|   |   |
|---|---|
| 1 | 6 |
| 1 | 4 |
| 0 | 6 |
| 0 | 3 |

|   |    |
|---|----|
| 0 | 2  |
| 0 | 10 |
| 2 | 11 |
| 0 | 4  |
| 1 | 5  |
| 0 | 9  |
| 1 | 7  |
| 1 | 5  |
| 0 | 2  |
| 0 | 6  |
| 0 | 2  |
| 0 | 0  |
| 1 | 11 |
| 1 | 5  |
| 0 | 8  |
| 1 | 5  |

|   |    |
|---|----|
| 0 | 6  |
| 1 | 9  |
| 3 | 13 |
| 0 | 4  |
| 1 | 13 |
| 0 | 9  |
| 0 | 3  |
| 1 | 6  |
| 1 | 13 |
| 0 | 6  |
| 0 | 7  |
| 0 | 2  |
| 2 | 14 |
| 1 | 8  |
| 0 | 9  |
| 1 | 7  |

|    |        |
|----|--------|
| 16 | Totaal |
|----|--------|

|   |    |
|---|----|
| 1 | 9  |
| 0 | 5  |
| 1 | 19 |
| 0 | 4  |
| 0 | 7  |
| 0 | 7  |
| 0 | 3  |
| 0 | 4  |

|   |    |
|---|----|
| 0 | 6  |
| 0 | 6  |
| 0 | 4  |
| 1 | 7  |
| 0 | 2  |
| 0 | 11 |
| 0 | 4  |
| 2 | 9  |
| 1 | 12 |
| 0 | 7  |
| 2 | 14 |
| 0 | 4  |
| 1 | 9  |
| 1 | 8  |
| 0 | 4  |
| 1 | 10 |
| 0 | 5  |
| 1 | 8  |
| 0 | 1  |
| 1 | 7  |
| 1 | 8  |
| 1 | 15 |
| 0 | 5  |
| 1 | 9  |
| 1 | 10 |
| 0 | 4  |
| 2 | 21 |
| 0 | 7  |
| 1 | 8  |
| 1 | 6  |
| 0 | 3  |
| 1 | 9  |
| 0 | 5  |
| 0 | 6  |
| 0 | 2  |
| 1 | 6  |
| 1 | 5  |
| 1 | 11 |
| 0 | 5  |
| 1 | 9  |
