# Supplementary material for: Objective Assessment of Chronic Pain in Horses Using the Horse Chronic Pain Scale (HCPS): A Scale-Construction Study
Source: MDPI journal article supplement (doi:10.3390/ani11061826), 2021-06-18
Supplement: s1 [file s1]

## FAP week 1

| Horse | Day | Time | Head | Eyelids | Focus | Nostrils | Corners m | /l | Muscle ton |
|-------|-----|------|------|---------|-------|----------|-----------|----|------------|
|       | 1   | 1    |      | 0       | 0     | 0        | 0         | 0  | 0          |
|       | 2   | 1    |      | 0       | 0     | 0        | 0         | 0  | 0          |
|       | 3   | 1    |      | 0       | 1     | 0        | 0         | 2  | 0          |
|       | 4   | 1    |      | 0       | 0     | 0        | 0         | 0  | 0          |
|       | 5   | 1    |      | 0       | 0     | 0        | 0         | 0  | 0          |
|       | 6   | 1    |      | 0       | 0     | 0        | 0         | 0  | 0          |
|       | 7   | 1    |      | 0       | 0     | 0        | 0         | 0  | 0          |
|       | 8   | 1    |      | 0       | 1     | 0        | 1         | 0  | 0          |
|       | 9   | 1    |      | 0       | 0     | 0        | 0         | 2  | 0          |
| 10    | 1   |      |      | 0       | 0     | 0        | 0         | 0  | 0          |
| 11    | 1   |      |      | 2       | 0     | 0        | 0         | 0  | 0          |
| 12    | 1   |      |      | 0       | 0     | 0        | 0         | 0  | 0          |
|       |     |      |      |         |       |          |           |    |            |
|       | 1   | 2    |      | 0       | 0     | 0        | 0         | 0  | 0          |
|       | 2   | 2    |      | 0       | 0     | 0        | 0         | 2  | 0          |
|       | 3   | 2    |      | 0       | 1     | 0        | 0         | 2  | 0          |
|       | 4   | 2    |      | 0       | 0     | 0        | 0         | 2  | 0          |
|       | 5   | 2    |      | 0       | 1     | 0        | 1         | 2  | 0          |
|       | 6   | 2    |      | 0       | 0     | 0        | 0         | 0  | 0          |
|       | 7   | 2    |      | 0       | 0     | 0        | 1         | 2  | 0          |
|       | 8   | 2    |      | 0       | 1     | 0        | 1         | 2  | 0          |
|       | 9   | 2    |      | 0       | 0     | 0        | 0         | 0  | 0          |
| 10    | 2   |      |      | 0       | 0     | 0        | 0         | 2  | 0          |
| 11    | 2   |      |      | 0       | 0     | 0        | 0         | 0  | 0          |
| 12    | 2   |      |      | 0       | 0     | 0        | 0         | 0  | 0          |
|       |     |      |      |         |       |          |           |    |            |
|       | 1   | 3    |      | 0       | 1     | 0        | 0         | 0  | 0          |
|       | 2   | 3    |      | 0       | 1     | 0        | 0         | 2  | 0          |
|       | 3   | 3    |      | 0       | 1     | 0        | 0         | 2  | 0          |
|       | 4   | 3    |      | 0       | 0     | 0        | 0         | 0  | 0          |
|       | 5   | 3    |      | 0       | 1     | 0        | 1         | 2  | 0          |
|       | 6   | 3    |      | 0       | 1     | 0        | 1         | 2  | 0          |
|       | 7   | 3    |      | 0       | 0     | 0        | 1         | 2  | 0          |
|       | 8   | 3    |      | 0       | 1     | 0        | 1         | 2  | 0          |
|       | 9   | 3    |      | 0       | 0     | 0        | 0         | 0  | 0          |
| 10    | 3   |      |      | 0       | 0     | 0        | 0         | 0  | 0          |
| 11    | 3   |      |      | 0       | 0     | 0        | 0         | 0  | 0          |
| 12    | 3   |      |      | 0       | 0     | 0        | 1         | 0  | 0          |

## FAP week 2

| Horse | Day | Time | Head | Eyelids | Focus | Nostrils | Corners m/l | Muscle ton |
|-------|-----|------|------|---------|-------|----------|-------------|------------|
| 1     | 1   | 1    |      | 0       | 0     | 0        | 0           | 0          |
| 2     | 1   | 1    |      | 0       | 0     | 0        | 1           | 0          |
| 3     | 1   | 1    |      | 0       | 1     | 0        | 0           | 0          |
| 4     | 1   | 1    |      | 0       | 0     | 0        | 0           | 0          |
| 5     | 1   | 1    |      | 0       | 1     | 0        | 0           | 0          |
| 6     | 1   | 1    |      | 0       | 1     | 0        | 1           | 2          |
| 7     | 1   | 1    |      | 0       | 0     | 0        | 0           | 0          |

|    |   |   |   |   |   |   |   |
|----|---|---|---|---|---|---|---|
| 8  | 1 | 0 | 0 | 0 | 0 | 0 | 0 |
| 9  | 1 | 0 | 1 | 0 | 1 | 2 | 0 |
| 10 | 1 | 0 | 0 | 0 | 0 | 0 | 0 |
| 11 | 1 | 0 | 0 | 0 | 0 | 0 | 0 |
| 12 | 1 | 0 | 0 | 0 | 0 | 0 | 0 |
| 13 | 1 | 0 | 1 | 0 | 0 | 0 | 0 |
| 14 | 1 | 0 | 0 | 0 | 0 | 0 | 0 |
| 15 | 1 | 0 | 0 | 0 | 0 | 0 | 0 |
| 16 | 1 | 0 | 1 | 0 | 0 | 0 | 0 |

|    |   |   |   |   |   |   |   |
|----|---|---|---|---|---|---|---|
| c  | 2 | 0 | 0 | 0 | 0 | 0 | 0 |
| 2  | 2 | 0 | 1 | 0 | 1 | 2 | 0 |
| 3  | 2 | 0 | 1 | 0 | 0 | 0 | 0 |
| 4  | 2 | 0 | 0 | 0 | 0 | 0 | 0 |
| 5  | 2 | 0 | 1 | 0 | 1 | 0 | 0 |
| 6  | 2 | 0 | 1 | 0 | 1 | 0 | 0 |
| 7  | 2 | 0 | 1 | 0 | 0 | 0 | 0 |
| 8  | 2 | 0 | 0 | 0 | 0 | 0 | 0 |
| 9  | 2 | 0 | 1 | 0 | 1 | 0 | 0 |
| 10 | 2 | 0 | 1 | 0 | 0 | 0 | 0 |
| 11 | 2 | 0 | 0 | 0 | 0 | 0 | 0 |
| 12 | 2 | 0 | 1 | 0 | 0 | 0 | 0 |
| 13 | 2 | 0 | 1 | 0 | 0 | 0 | 0 |
| 14 | 2 | 0 | 0 | 0 | 0 | 0 | 0 |
| 15 | 2 | 0 | 1 | 0 | 1 | 0 | 0 |
| 16 | 2 | 0 | 1 | 0 | 1 | 0 | 0 |

|    |   |   |   |   |   |   |   |
|----|---|---|---|---|---|---|---|
| 1  | 3 | 0 | 0 | 0 | 0 | 0 | 0 |
| 2  | 3 | 0 | 1 | 0 | 0 | 0 | 0 |
| 3  | 3 | 0 | 1 | 0 | 0 | 0 | 0 |
| 4  | 3 | 0 | 1 | 0 | 0 | 0 | 0 |
| 5  | 3 | 0 | 1 | 0 | 1 | 0 | 0 |
| 6  | 3 | 0 | 1 | 0 | 1 | 2 | 0 |
| 7  | 3 | 0 | 1 | 0 | 0 | 0 | 0 |
| 8  | 3 | 0 | 0 | 0 | 0 | 0 | 0 |
| 9  | 3 | 0 | 1 | 0 | 0 | 0 | 0 |
| 10 | 3 | 0 | 1 | 0 | 0 | 0 | 0 |
| 11 | 3 | 0 | 0 | 0 | 0 | 0 | 0 |
| 12 | 3 | 0 | 1 | 0 | 0 | 0 | 0 |
| 13 | 3 | 0 | 1 | 0 | 0 | 0 | 0 |
| 14 | 3 | 0 | 0 | 0 | 0 | 0 | 0 |
| 15 | 3 | 0 | 1 | 0 | 1 | 0 | 0 |
| 16 | 3 | 0 | 1 | 0 | 1 | 2 | 0 |

FAP week 3

| Horse | Day | Time | Head | Eyelids | Focus | Nostrils | Corners m/l | Muscle ton |
|-------|-----|------|------|---------|-------|----------|-------------|------------|
| 1     | 1   |      |      | 0       | 1     | 0        | 0           | 0          |
| 2     | 1   |      |      | 0       | 0     | 0        | 2           | 0          |
| 3     | 1   |      |      | 0       | 0     | 0        | 0           | 0          |

|    |   |   |   |   |   |   |   |
|----|---|---|---|---|---|---|---|
| 4  | 1 | 0 | 0 | 0 | 0 | 2 | 0 |
| 5  | 1 | 0 | 0 | 0 | 0 | 0 | 0 |
| 6  | 1 | 0 | 1 | 0 | 0 | 0 | 0 |
| 7  | 1 | 0 | 1 | 0 | 0 | 2 | 0 |
| 8  | 1 | 0 | 0 | 0 | 0 | 0 | 0 |
| 9  | 1 | 0 | 0 | 0 | 0 | 0 | 0 |
| 10 | 1 | 0 | 1 | 0 | 0 | 2 | 0 |
| 11 | 1 | 0 | 1 | 0 | 0 | 0 | 0 |
| 12 | 1 | 0 | 0 | 0 | 0 | 0 | 0 |
| 13 | 1 | 0 | 1 | 0 | 0 | 2 | 0 |
| 14 | 1 | 0 | 0 | 0 | 0 | 2 | 0 |

|    |   |   |   |   |   |   |   |
|----|---|---|---|---|---|---|---|
| 1  | 2 | 0 | 1 | 0 | 0 | 0 | 0 |
| 2  | 2 | 0 | 0 | 0 | 0 | 2 | 0 |
| 3  | 2 | 0 | 1 | 0 | 0 | 0 | 0 |
| 4  | 2 | 0 | 1 | 0 | 0 | 0 | 0 |
| 5  | 2 | 0 | 0 | 0 | 0 | 0 | 0 |
| 6  | 2 | 0 | 1 | 0 | 0 | 0 | 0 |
| 7  | 2 | 0 | 1 | 0 | 0 | 2 | 0 |
| 8  | 2 | 0 | 0 | 0 | 0 | 0 | 0 |
| 9  | 2 | 0 | 0 | 0 | 0 | 0 | 0 |
| 10 | 2 | 0 | 1 | 0 | 1 | 2 | 0 |
| 11 | 2 | 0 | 0 | 0 | 0 | 0 | 0 |
| 12 | 2 | 0 | 1 | 0 | 0 | 0 | 0 |
| 13 | 2 | 0 | 1 | 0 | 0 | 0 | 0 |
| 14 | 2 | 0 | 0 | 0 | 0 | 0 | 0 |

|    |   |   |   |   |   |   |   |
|----|---|---|---|---|---|---|---|
| 1  | 3 | 0 | 2 | 0 | 1 | 0 | 0 |
| 2  | 3 | 0 | 2 | 0 | 1 | 2 | 0 |
| 3  | 3 | 0 | 1 | 0 | 0 | 0 | 0 |
| 4  | 3 | 0 | 1 | 0 | 0 | 0 | 0 |
| 5  | 3 | 0 | 0 | 0 | 0 | 0 | 0 |
| 6  | 3 | 0 | 1 | 0 | 0 | 2 | 0 |
| 7  | 3 | 0 | 1 | 0 | 0 | 2 | 0 |
| 8  | 3 | 0 | 1 | 0 | 0 | 0 | 0 |
| 9  | 3 | 0 | 0 | 0 | 0 | 0 | 0 |
| 10 | 3 | 0 | 1 | 0 | 0 | 2 | 0 |
| 11 | 3 | 0 | 0 | 0 | 0 | 0 | 0 |
| 12 | 3 | 0 | 1 | 0 | 0 | 2 | 0 |
| 13 | 3 | 0 | 1 | 0 | 0 | 2 | 0 |
| 14 | 3 | 0 | 1 | 0 | 0 | 0 | 0 |

FAP week 4

| Horse | Day | Time | Head | Eyelids | Focus | Nostrils | Corners m/l | Muscle ton |
|-------|-----|------|------|---------|-------|----------|-------------|------------|
| 1     | 1   |      | 0    | 1       | 0     | 1        | 2           | 0          |
| 2     | 1   |      | 0    | 2       | 0     | 0        | 2           | 0          |
| 3     | 1   |      | 0    | 2       | 0     | 1        | 2           | 0          |
| 4     | 1   |      | 0    | 0       | 0     | 0        | 0           | 0          |
| 5     | 1   |      | 0    | 0       | 0     | 1        | 0           | 0          |

|    |   |   |   |   |   |   |   |
|----|---|---|---|---|---|---|---|
| 6  | 1 | 0 | 2 | 0 | 0 | 2 | 0 |
| 7  | 1 | 0 | 1 | 0 | 0 | 0 | 0 |
| 8  | 1 | 0 | 1 | 0 | 0 | 2 | 0 |
| 9  | 1 | 0 | 1 | 0 | 0 | 2 | 0 |
| 10 | 1 | 0 | 1 | 0 | 1 | 0 | 0 |
| 11 | 1 | 0 | 0 | 0 | 0 | 0 | 0 |
| 12 | 1 | 0 | 1 | 0 | 2 | 2 | 0 |

|    |   |   |   |   |   |   |   |
|----|---|---|---|---|---|---|---|
| 1  | 2 | 0 | 1 | 0 | 1 | 2 | 0 |
| 2  | 2 | 0 | 2 | 0 | 0 | 2 | 0 |
| 3  | 2 | 0 | 2 | 0 | 1 | 2 | 0 |
| 4  | 2 | 0 | 0 | 0 | 0 | 0 | 0 |
| 5  | 2 | 0 | 0 | 0 | 1 | 0 | 0 |
| 6  | 2 | 0 | 2 | 0 | 0 | 2 | 0 |
| 7  | 2 | 0 | 1 | 0 | 0 | 0 | 0 |
| 8  | 2 | 0 | 0 | 0 | 0 | 0 | 0 |
| 9  | 2 | 0 | 1 | 0 | 0 | 2 | 0 |
| 10 | 2 | 0 | 1 | 0 | 1 | 0 | 0 |
| 11 | 2 | 0 | 0 | 0 | 0 | 0 | 0 |
| 12 | 2 | 0 | 1 | 0 | 2 | 2 | 0 |

|    |   |   |   |   |   |   |   |
|----|---|---|---|---|---|---|---|
| 1  | 3 | 0 | 1 | 0 | 1 | 2 | 0 |
| 2  | 3 | 0 | 2 | 0 | 1 | 2 | 0 |
| 3  | 3 | 0 | 2 | 0 | 1 | 2 | 0 |
| 4  | 3 | 0 | 1 | 0 | 0 | 0 | 0 |
| 5  | 3 | 0 | 0 | 0 | 1 | 0 | 0 |
| 6  | 3 | 0 | 2 | 0 | 0 | 2 | 0 |
| 7  | 3 | 0 | 1 | 0 | 0 | 0 | 0 |
| 8  | 3 | 0 | 1 | 0 | 0 | 2 | 0 |
| 9  | 3 | 0 | 1 | 0 | 0 | 2 | 0 |
| 10 | 3 | 0 | 1 | 0 | 1 | 0 | 0 |
| 11 | 3 | 0 | 1 | 0 | 1 | 0 | 0 |
| 12 | 3 | 0 | 2 | 0 | 2 | 2 | 0 |

FAP week 1 autumn

| Horse | Day | Time | Head | Eyelids | Focus | Nostrils | Corners m /l | Muscle ton |
|-------|-----|------|------|---------|-------|----------|--------------|------------|
| 1     | 1   |      | 0    | 0       | 0     | 0        | 0            | 0          |
| 2     | 1   |      | 0    | 1       | 0     | 0        | 2            | 0          |
| 3     | 1   |      | 0    | 2       | 0     | 2        | 0            | 0          |
| 4     | 1   |      | 0    | 2       | 0     | 2        | 2            | 0          |
| 5     | 1   |      | 0    | 0       | 0     | 0        | 0            | 0          |
| 6     | 1   |      | 0    | 1       | 0     | 0        | 2            | 0          |
| 7     | 1   |      | 0    | 0       | 0     | 0        | 0            | 0          |
| 8     | 1   |      | 0    | 1       | 0     | 0        | 0            | 0          |
| 9     | 1   |      | 0    | 0       | 0     | 0        | 0            | 0          |
| 10    | 1   |      | 0    | 1       | 0     | 0        | 0            | 0          |
| 11    | 1   |      | 0    | 0       | 0     | 0        | 0            | 0          |
| 12    | 1   |      | 0    | 0       | 0     | 0        | 0            | 0          |
| 13    | 1   |      | 0    | 0       | 0     | 0        | 0            | 0          |

|    |   |   |   |   |   |   |   |
|----|---|---|---|---|---|---|---|
| 14 | 1 | 0 | 0 | 0 | 1 | 0 | 0 |
| 15 | 1 | 0 | 1 | 0 | 0 | 0 | 0 |
| 16 | 1 | 0 | 0 | 0 | 0 | 0 | 0 |
| 1  | 2 | 0 | 0 | 0 | 1 | 0 | 0 |
| 2  | 2 | 0 | 1 | 0 | 0 | 2 | 0 |
| 3  | 2 | 0 | 2 | 0 | 2 | 2 | 0 |
| 4  | 2 | 0 | 1 | 0 | 2 | 2 | 0 |
| 5  | 2 | 0 | 0 | 0 | 0 | 0 | 0 |
| 6  | 2 | 0 | 1 | 0 | 0 | 2 | 0 |
| 7  | 2 | 0 | 1 | 0 | 0 | 0 | 0 |
| 8  | 2 | 0 | 1 | 0 | 0 | 2 | 0 |
| 9  | 2 | 0 | 0 | 0 | 0 | 0 | 0 |
| 10 | 2 | 0 | 1 | 0 | 0 | 2 | 0 |
| 11 | 2 | 0 | 0 | 0 | 0 | 0 | 0 |
| 12 | 2 | 0 | 0 | 0 | 0 | 0 | 0 |
| 13 | 2 | 0 | 1 | 0 | 0 | 2 | 0 |
| 14 | 2 | 0 | 0 | 0 | 1 | 0 | 0 |
| 15 | 2 | 0 | 1 | 0 | 0 | 2 | 0 |
| 16 | 2 | 0 | 0 | 0 | 1 | 0 | 0 |
| 1  | 3 | 0 | 0 | 0 | 1 | 0 | 0 |
| 2  | 3 | 0 | 1 | 0 | 1 | 2 | 0 |
| 3  | 3 | 0 | 2 | 0 | 2 | 2 | 0 |
| 4  | 3 | 0 | 1 | 0 | 2 | 2 | 0 |
| 5  | 3 | 0 | 0 | 0 | 0 | 0 | 0 |
| 6  | 3 | 0 | 1 | 0 | 1 | 2 | 0 |
| 7  | 3 | 0 | 1 | 0 | 1 | 0 | 0 |
| 8  | 3 | 0 | 1 | 0 | 0 | 2 | 0 |
| 9  | 3 | 0 | 1 | 0 | 1 | 2 | 0 |
| 10 | 3 | 0 | 2 | 0 | 0 | 2 | 0 |
| 11 | 3 | 0 | 0 | 0 | 0 | 0 | 0 |
| 12 | 3 | 0 | 0 | 0 | 0 | 0 | 0 |
| 13 | 3 | 0 | 1 | 0 | 1 | 2 | 0 |
| 14 | 3 | 0 | 0 | 0 | 1 | 0 | 0 |
| 15 | 3 | 0 | 1 | 0 | 0 | 2 | 0 |
| 16 | 3 | 0 | 0 | 0 | 1 | 0 | 0 |

FAP week 2 autumn

| Horse | Day | Time | Head | Eyelids | Focus | Nostrils | Corners m/l | Muscle ton |
|-------|-----|------|------|---------|-------|----------|-------------|------------|
| 1     | 1   |      |      | 0       | 0     | 0        | 1           | 0          |
| 2     | 1   |      |      | 0       | 0     | 0        | 0           | 0          |
| 3     | 1   |      |      | 0       | 2     | 0        | 1           | 0          |
| 4     | 1   |      |      | 0       | 1     | 0        | 0           | 0          |
| 5     | 1   |      |      | 0       | 1     | 0        | 1           | 2          |
| 6     | 1   |      |      | 0       | 1     | 0        | 1           | 0          |
| 7     | 1   |      |      | 0       | 1     | 0        | 0           | 0          |
| 8     | 1   |      |      | 0       | 1     | 0        | 1           | 2          |
| 9     | 1   |      |      | 0       | 2     | 0        | 0           | 2          |

|    |   |   |   |   |   |   |   |
|----|---|---|---|---|---|---|---|
| 10 | 1 | 0 | 2 | 0 | 0 | 2 | 0 |
| 11 | 1 | 0 | 0 | 0 | 0 | 0 | 0 |
| 12 | 1 | 0 | 1 | 0 | 0 | 0 | 0 |
| 13 | 1 | 0 | 1 | 0 | 0 | 0 | 0 |
| 14 | 1 | 0 | 1 | 0 | 0 | 0 | 0 |
| 15 | 1 | 0 | 1 | 0 | 1 | 0 | 0 |
| 16 | 1 | 0 | 1 | 0 | 1 | 2 | 0 |

|    |   |   |   |   |   |   |   |
|----|---|---|---|---|---|---|---|
| 1  | 2 | 0 | 0 | 0 | 1 | 0 | 0 |
| 2  | 2 | 0 | 1 | 0 | 0 | 0 | 0 |
| 3  | 2 | 0 | 2 | 0 | 1 | 2 | 0 |
| 4  | 2 | 0 | 1 | 0 | 0 | 0 | 0 |
| 5  | 2 | 0 | 2 | 0 | 1 | 2 | 0 |
| 6  | 2 | 0 | 1 | 0 | 1 | 0 | 0 |
| 7  | 2 | 0 | 2 | 0 | 0 | 0 | 0 |
| 8  | 2 | 0 | 1 | 0 | 1 | 0 | 0 |
| 9  | 2 | 0 | 2 | 0 | 1 | 2 | 0 |
| 10 | 2 | 0 | 2 | 0 | 0 | 2 | 0 |
| 11 | 2 | 0 | 0 | 0 | 0 | 0 | 0 |
| 12 | 2 | 0 | 0 | 0 | 1 | 0 | 0 |
| 13 | 2 | 0 | 0 | 0 | 0 | 0 | 0 |
| 14 | 2 | 0 | 1 | 1 | 0 | 0 | 0 |
| 15 | 2 | 0 | 1 | 0 | 1 | 0 | 0 |
| 16 | 2 | 0 | 1 | 0 | 1 | 2 | 0 |

|    |   |   |   |   |   |   |   |
|----|---|---|---|---|---|---|---|
| 1  | 3 | 0 | 0 | 0 | 1 | 0 | 0 |
| 2  | 3 | 0 | 1 | 0 | 0 | 0 | 0 |
| 3  | 3 | 0 | 2 | 0 | 1 | 2 | 0 |
| 4  | 3 | 0 | 1 | 0 | 0 | 0 | 0 |
| 5  | 3 | 0 | 2 | 0 | 1 | 2 | 0 |
| 6  | 3 | 0 | 1 | 0 | 1 | 0 | 0 |
| 7  | 3 | 0 | 1 | 0 | 0 | 0 | 0 |
| 8  | 3 | 0 | 1 | 0 | 1 | 0 | 0 |
| 9  | 3 | 0 | 2 | 0 | 1 | 2 | 0 |
| 10 | 3 | 0 | 2 | 0 | 2 | 0 | 0 |
| 11 | 3 | 0 | 0 | 0 | 0 | 0 | 0 |
| 12 | 3 | 0 | 1 | 0 | 0 | 0 | 0 |
| 13 | 3 | 0 | 0 | 0 | 0 | 0 | 0 |
| 14 | 3 | 0 | 1 | 0 | 1 | 0 | 0 |
| 15 | 3 | 0 | 1 | 0 | 1 | 0 | 0 |
| 16 | 3 | 0 | 1 | 0 | 1 | 2 | 0 |

| Flehming | Teethgrind | Ear response | Totaal |
|----------|------------|--------------|--------|
| 0        | 0          | 0            | 0      |
| 0        | 0          | 0            | 0      |
| 0        | 0          | 0            | 3      |
| 0        | 0          | 0            | 0      |
| 0        | 0          | 0            | 0      |
| 0        | 0          | 0            | 0      |
| 0        | 0          | 0            | 0      |
| 0        | 0          | 0            | 2      |
| 0        | 0          | 0            | 2      |
| 0        | 0          | 0            | 0      |
| 0        | 0          | 0            | 2      |
| 0        | 0          | 0            | 0      |
| 0        | 0          | 0            | 0      |
| 0        | 0          | 0            | 0      |
| 0        | 0          | 0            | 2      |
| 0        | 0          | 0            | 3      |
| 0        | 0          | 0            | 4      |
| 0        | 0          | 0            | 0      |
| 0        | 0          | 0            | 3      |
| 0        | 0          | 0            | 4      |
| 0        | 0          | 0            | 0      |
| 0        | 0          | 0            | 2      |
| 0        | 0          | 0            | 0      |
| 0        | 0          | 0            | 0      |
| 0        | 0          | 0            | 1      |
| 0        | 0          | 0            | 3      |
| 0        | 0          | 0            | 3      |
| 0        | 0          | 0            | 0      |
| 0        | 0          | 0            | 4      |
| 0        | 0          | 0            | 4      |
| 0        | 0          | 0            | 3      |
| 0        | 0          | 0            | 4      |
| 0        | 0          | 0            | 0      |
| 0        | 0          | 0            | 0      |
| 0        | 0          | 0            | 0      |
| 0        | 0          | 0            | 1      |

| Flehming | Teethgrind | Ear response | Totaal |
|----------|------------|--------------|--------|
| 0        | 0          | 0            | 0      |
| 0        | 0          | 0            | 1      |
| 0        | 0          | 0            | 1      |
| 0        | 0          | 0            | 0      |
| 0        | 0          | 0            | 1      |
| 0        | 0          | 0            | 4      |
| 0        | 0          | 0            | 0      |

|   |   |   |   |
|---|---|---|---|
| 0 | 0 | 0 | 0 |
| 0 | 0 | 0 | 4 |
| 0 | 0 | 0 | 0 |
| 0 | 0 | 0 | 0 |
| 0 | 0 | 0 | 0 |
| 0 | 0 | 0 | 1 |
| 0 | 0 | 0 | 0 |
| 0 | 0 | 0 | 0 |
| 0 | 0 | 0 | 1 |

|   |   |   |   |
|---|---|---|---|
| 0 | 0 | 0 | 0 |
| 0 | 0 | 0 | 4 |
| 0 | 0 | 0 | 1 |
| 0 | 0 | 0 | 0 |
| 0 | 0 | 0 | 2 |
| 0 | 0 | 0 | 2 |
| 0 | 0 | 0 | 1 |
| 0 | 0 | 0 | 0 |
| 0 | 0 | 0 | 2 |
| 0 | 0 | 0 | 1 |
| 0 | 0 | 0 | 0 |
| 0 | 0 | 0 | 1 |
| 0 | 0 | 0 | 1 |
| 0 | 0 | 0 | 0 |
| 0 | 0 | 0 | 2 |
| 0 | 0 | 0 | 2 |

|   |   |   |   |
|---|---|---|---|
| 0 | 0 | 0 | 0 |
| 0 | 0 | 0 | 1 |
| 0 | 0 | 0 | 1 |
| 0 | 0 | 0 | 1 |
| 0 | 0 | 0 | 2 |
| 0 | 0 | 0 | 4 |
| 0 | 0 | 0 | 1 |
| 0 | 0 | 0 | 0 |
| 0 | 0 | 0 | 1 |
| 0 | 0 | 0 | 1 |
| 0 | 0 | 0 | 0 |
| 0 | 0 | 0 | 1 |
| 0 | 0 | 0 | 1 |
| 0 | 0 | 0 | 0 |
| 0 | 0 | 0 | 2 |
| 0 | 0 | 0 | 4 |

| Flehming | Teethgrind | Ear response | Totaal |
|----------|------------|--------------|--------|
| 0        | 0          | 0            | 1      |
| 0        | 0          | 0            | 2      |
| 0        | 0          | 0            | 0      |



|   |   |   |   |
|---|---|---|---|
| 0 | 0 | 0 | 2 |
| 0 | 0 | 0 | 0 |
| 0 | 0 | 0 | 1 |
| 0 | 0 | 0 | 3 |
| 0 | 0 | 0 | 0 |
| 0 | 0 | 0 | 0 |
| 0 | 0 | 0 | 3 |
| 0 | 0 | 0 | 1 |
| 0 | 0 | 0 | 0 |
| 0 | 0 | 0 | 3 |
| 0 | 0 | 0 | 2 |

|   |   |   |   |
|---|---|---|---|
| 0 | 0 | 0 | 1 |
| 0 | 0 | 0 | 2 |
| 0 | 0 | 0 | 1 |
| 0 | 0 | 0 | 1 |
| 0 | 0 | 0 | 0 |
| 0 | 0 | 0 | 1 |
| 0 | 0 | 0 | 3 |
| 0 | 0 | 0 | 0 |
| 0 | 0 | 0 | 0 |
| 0 | 0 | 0 | 4 |
| 0 | 0 | 0 | 0 |
| 0 | 0 | 0 | 1 |
| 0 | 0 | 0 | 1 |
| 0 | 0 | 0 | 0 |

|   |   |   |   |
|---|---|---|---|
| 0 | 0 | 0 | 3 |
| 0 | 0 | 0 | 5 |
| 0 | 0 | 0 | 1 |
| 0 | 0 | 0 | 1 |
| 0 | 0 | 0 | 0 |
| 0 | 0 | 0 | 3 |
| 0 | 0 | 0 | 3 |
| 0 | 0 | 0 | 1 |
| 0 | 0 | 0 | 0 |
| 0 | 0 | 0 | 3 |
| 0 | 0 | 0 | 0 |
| 0 | 0 | 0 | 3 |
| 0 | 0 | 0 | 3 |
| 0 | 0 | 0 | 1 |

| Flehming | Teethgrind | Ear response | Totaal |
|----------|------------|--------------|--------|
| 0        | 0          | 0            | 4      |
| 0        | 0          | 0            | 4      |
| 0        | 0          | 0            | 5      |
| 0        | 0          | 0            | 0      |
| 0        | 0          | 0            | 1      |

|   |   |   |   |
|---|---|---|---|
| 0 | 0 | 0 | 4 |
| 0 | 0 | 0 | 1 |
| 0 | 0 | 0 | 3 |
| 0 | 0 | 0 | 3 |
| 0 | 0 | 0 | 2 |
| 0 | 0 | 0 | 0 |
| 0 | 0 | 0 | 5 |

|   |   |   |   |
|---|---|---|---|
| 0 | 0 | 0 | 4 |
| 0 | 0 | 0 | 4 |
| 0 | 0 | 0 | 5 |
| 0 | 0 | 0 | 0 |
| 0 | 0 | 0 | 1 |
| 0 | 0 | 0 | 4 |
| 0 | 0 | 0 | 1 |
| 0 | 0 | 0 | 0 |
| 0 | 0 | 0 | 3 |
| 0 | 0 | 0 | 2 |
| 0 | 0 | 0 | 0 |
| 0 | 0 | 0 | 5 |

|   |   |   |   |
|---|---|---|---|
| 0 | 0 | 0 | 4 |
| 0 | 0 | 0 | 5 |
| 0 | 0 | 0 | 5 |
| 0 | 0 | 0 | 1 |
| 0 | 0 | 0 | 1 |
| 0 | 0 | 0 | 4 |
| 0 | 0 | 0 | 1 |
| 0 | 0 | 0 | 3 |
| 0 | 0 | 0 | 3 |
| 0 | 0 | 0 | 2 |
| 0 | 0 | 0 | 2 |
| 0 | 0 | 0 | 6 |

| Flehming | Teethgrind | Ear response | Totaal |
|----------|------------|--------------|--------|
| 0        | 0          | 0            | 0      |
| 0        | 0          | 0            | 3      |
| 0        | 0          | 0            | 4      |
| 0        | 0          | 0            | 6      |
| 0        | 0          | 0            | 0      |
| 0        | 0          | 0            | 3      |
| 0        | 0          | 0            | 0      |
| 0        | 0          | 0            | 1      |
| 0        | 0          | 0            | 0      |
| 0        | 0          | 0            | 1      |
| 0        | 0          | 0            | 0      |
| 0        | 0          | 0            | 0      |
| 0        | 0          | 0            | 0      |

|   |   |   |   |
|---|---|---|---|
| 0 | 0 | 0 | 1 |
| 0 | 0 | 0 | 1 |
| 0 | 0 | 0 | 0 |

|   |   |   |   |
|---|---|---|---|
| 0 | 0 | 0 | 1 |
| 0 | 0 | 0 | 3 |
| 0 | 0 | 0 | 6 |
| 0 | 0 | 0 | 5 |
| 0 | 0 | 0 | 0 |
| 0 | 0 | 0 | 3 |
| 0 | 0 | 0 | 1 |
| 0 | 0 | 0 | 3 |
| 0 | 0 | 0 | 0 |
| 0 | 0 | 0 | 3 |
| 0 | 0 | 0 | 0 |
| 0 | 0 | 0 | 0 |
| 0 | 0 | 0 | 3 |
| 0 | 0 | 0 | 1 |
| 0 | 0 | 0 | 3 |
| 0 | 0 | 0 | 1 |

|   |   |   |   |
|---|---|---|---|
| 0 | 0 | 0 | 1 |
| 0 | 0 | 0 | 4 |
| 0 | 0 | 0 | 6 |
| 0 | 0 | 0 | 5 |
| 0 | 0 | 0 | 0 |
| 0 | 0 | 0 | 4 |
| 0 | 0 | 0 | 2 |
| 0 | 0 | 0 | 3 |
| 0 | 0 | 0 | 4 |
| 0 | 0 | 0 | 4 |
| 0 | 0 | 0 | 0 |
| 0 | 0 | 0 | 0 |
| 0 | 0 | 0 | 4 |
| 0 | 0 | 0 | 1 |
| 0 | 0 | 0 | 3 |
| 0 | 0 |   | 1 |

| Flehming | Teethgrind | Ear response | Totaal |
|----------|------------|--------------|--------|
| 0        | 0          | 0            | 1      |
| 0        | 0          | 0            | 0      |
| 0        | 0          | 0            | 5      |
| 0        | 0          | 0            | 1      |
| 0        | 0          | 0            | 4      |
| 0        | 0          | 0            | 2      |
| 0        | 0          | 0            | 1      |
| 0        | 0          | 0            | 4      |
| 0        | 0          | 0            | 4      |

|   |   |   |   |
|---|---|---|---|
| 0 | 0 | 0 | 4 |
| 0 | 0 | 0 | 0 |
| 0 | 0 | 0 | 1 |
| 0 | 0 | 0 | 1 |
| 0 | 0 | 0 | 1 |
| 0 | 0 | 0 | 2 |
| 0 | 0 | 0 | 4 |

|   |   |   |   |
|---|---|---|---|
| 0 | 0 | 0 | 1 |
| 0 | 0 | 0 | 1 |
| 0 | 0 | 0 | 5 |
| 0 | 0 | 0 | 1 |
| 0 | 0 | 0 | 5 |
| 0 | 0 | 0 | 2 |
| 0 | 0 | 0 | 2 |
| 0 | 0 | 0 | 2 |
| 0 | 0 | 0 | 5 |
| 0 | 0 | 0 | 4 |
| 0 | 0 | 0 | 0 |
| 0 | 0 | 0 | 1 |
| 0 | 0 | 0 | 0 |
| 0 | 0 | 1 | 3 |
| 0 | 0 | 0 | 2 |
| 0 | 0 | 0 | 4 |

|   |   |   |   |
|---|---|---|---|
| 0 | 0 | 0 | 1 |
| 0 | 0 | 0 | 1 |
| 0 | 0 | 0 | 5 |
| 0 | 0 | 0 | 1 |
| 0 | 0 | 0 | 5 |
| 0 | 0 | 0 | 2 |
| 0 | 0 | 0 | 1 |
| 0 | 0 | 0 | 2 |
| 0 | 0 | 0 | 5 |
| 0 | 0 | 0 | 4 |
| 0 | 0 | 0 | 0 |
| 0 | 0 | 0 | 1 |
| 0 | 0 | 0 | 0 |
| 0 | 0 | 0 | 2 |
| 0 | 0 | 0 | 2 |
| 0 | 0 |   | 4 |
